# Supplementary material for: Salt Distribution in Raw Sheep Milk Cheese during Ripening and the Effect on Proteolysis and Lipolysis
Source: PubMed Central journal article supplement (PMC6462923; doi:10.3390/foods8030100), 2019-03-17
Supplement: foods-08-00100-s001.pdf [file foods-08-00100-s001.pdf]

**Supplementary Table S1.** Quaternary gradient for the separation of free amino acids in cheese derivatized with AQC by high performance liquid chromatography (HPLC-DAD-FLD).

| Gradient   |                 | Mobile phases      |             |                |
|------------|-----------------|--------------------|-------------|----------------|
| Time (min) | % A* (pH: 4.90) | % B (acetonitrile) | % C (water) | %D* (pH: 5.15) |
| 0.00       | 100             | 0                  | 0           | 0              |
| 0.40       | 98.7            | 1.3                | 0           | 0              |
| 3.84       | 97.5            | 2.5                | 0           | 0              |
| 4.00       | 97.5            | 2.5                | 0           | 0              |
| 7.76       | 96.3            | 3.7                | 0           | 0              |
| 11.28      | 95.1            | 4.9                | 0           | 0              |
| 14.80      | 94              | 6                  | 0           | 0              |
| 15.60      | 92              | 8                  | 0           | 0              |
| 16.40      | 91              | 9                  | 0           | 0              |
| 17.20      | 90              | 10                 | 0           | 0              |
| 20.50      | 0               | 21                 | 0           | 79             |
| 23.00      | 0               | 22                 | 0           | 78             |
| 27.00      | 0               | 60                 | 40          | 0              |
| 30.00      | 100             | 0                  | 0           | 0              |

\*: AccQ.Tag eluent solution prepared according to the manufacturer specification (Waters)

**Supplementary Table S2.** Significance of the effects ‘Ripening time’, ‘Dairy plant’ and ‘Sampling zone’ on the individual concentration of free amino acids (FFA) and total FAA, and Pearson coefficient (*r*) in raw sheep milk cheeses made in two dairies (D1 and D2) during 240 days of ripening.

|           | Dairy plant | Dairy plant D1 |               |               | Dairy plant D2 |               |               |
|-----------|-------------|----------------|---------------|---------------|----------------|---------------|---------------|
|           |             | ( <i>r</i> )   | Ripening time | Sampling zone | ( <i>r</i> )   | Ripening time | Sampling zone |
| Asp       | *           | 0.770          | ***           | NS            | 0.924          | ***           | NS            |
| Asn + Ser | ***         | 0.817          | ***           | NS            | 0.950          | ***           | NS            |
| Glu       | **          | 0.879          | ***           | NS            | 0.962          | ***           | NS            |
| Gly       | NS          | 0.853          | ***           | NS            | 0.913          | ***           | NS            |
| Hys + Gln | ***         | 0.853          | ***           | NS            | 0.913          | ***           | NS            |
| Tau       | NS          | 0.155          | NS            | NS            | -0.105         | NS            | NS            |
| Arg       | NS          | 0.080          | NS            | *             | 0.162          | NS            | *             |
| Cit + Thr | *           | 0.688          | ***           | NS            | 0.948          | ***           | NS            |
| Ala       | **          | 0.876          | ***           | NS            | 0.928          | ***           | NS            |
| Pro       | *           | 0.804          | ***           | NS            | 0.929          | ***           | NS            |
| Gaba      | *           | 0.677          | ***           | ***           | 0.595          | ***           | NS            |
| Cys       | ND          | ND             | -             | -             | ND             | -             | -             |
| Tyr       | *           | 0.421          | **            | *             | 0.684          | ***           | **            |
| Val       | NS          | 0.812          | ***           | NS            | 0.851          | ***           | NS            |
| Met       | ***         | 0.866          | ***           | NS            | 0.970          | ***           | NS            |
| Orn       | **          | 0.905          | ***           | **            | 0.903          | ***           | *             |
| Lys       | ***         | 0.939          | ***           | NS            | 0.935          | ***           | NS            |
| Ile       | *           | 0.937          | ***           | NS            | 0.925          | ***           | NS            |
| Leu       | NS          | 0.840          | ***           | NS            | 0.819          | ***           | NS            |
| Phe       | NS          | 0.877          | ***           | NS            | 0.899          | ***           | NS            |
| Trp       | NS          | 0.573          | **            | NS            | ND             | -             | -             |
| Total FAA | **          | 0.924          | ***           | NS            | 0.947          | ***           | NS            |

Significance levels: \*\*\*,  $P < 0.001$ ; \*\*,  $P < 0.01$ ; \* $P < 0.05$ ; NS, not significant; ND: not detected.

**Supplementary Table S3:** Significance of the effects 'Ripening time', 'Dairy plant' and 'Sampling zone' on relative concentrations of individual free fatty acids (FFA) and Pearson coefficient (r) in raw sheep milk cheeses made in two dairies (D1 and D2) during 240 days of ripening.

|         | Ripening time | Dairy plant | Sampling zone | Dairy plant D1 (r) | Dairy plant D2 (r) |
|---------|---------------|-------------|---------------|--------------------|--------------------|
| % C4:0  | ***           | ***         | NS            | 0.87               | 0.85               |
| % C6:0  | ***           | ***         | NS            | 0.90               | 0.80               |
| % C8:0  | ***           | NS          | NS            | 0.79               | 0.56               |
| % C10:0 | NS            | ***         | NS            | 0.15               | 0.19               |
| % C12:0 | NS            | **          | NS            | 0.02               | -0.01              |
| % C14:0 | **            | ***         | NS            | 0.54               | 0.21               |
| % C16:0 | ***           | **          | NS            | -0.28              | -0.53              |
| % C16:1 | **            | NS          | NS            | -0.28              | -0.34              |
| % C18:0 | ***           | *           | NS            | -0.64              | -0.70              |
| % C18:1 | **            | NS          | NS            | -0.50              | -0.17              |
| % C18:2 | ***           | NS          | NS            | -0.53              | -0.62              |
| % C18:3 | ***           | NS          | NS            | -0.83              | -0.86              |

Significance levels: \*\*\*, P < 0.001; \*\*, P < 0.01; \*P < 0.05; NS, not significant.
